# Supplementary material
Source: PubMed Central journal article supplement (PMC6440851)

## Supplementary Material

### Prenatal Dioxin Exposure and Neuropsychological Functioning in the Seveso Second Generation Health Study

Ames Jennifer<sup>a</sup>, Warner Marcella<sup>a</sup>, Siracusa Claudia<sup>b</sup>, Signorini Stefano<sup>b</sup>, Brambilla Paolo<sup>b</sup>, Mocarelli Paolo<sup>b</sup>, Eskenazi Brenda<sup>a</sup>

<sup>a</sup> Center for Environmental Research & Children's Health (CERCH), School of Public Health, University of California, Berkeley, California, USA

<sup>b</sup> Department of Laboratory Medicine, University of Milano-Bicocca, School of Medicine, Hospital of Desio, Desio-Milano, Italy

#### Tables:

*Supplementary Table 1:* Distributions of maternal TCDD concentrations (ppt, lipid-adjusted) in serum collected near 1976 and estimated to the time of the pregnancy, Seveso Second Generation Health Study, 2014-2016

*Supplementary Table 2:* Distributions of neuropsychological test scores for all children and stratified by child sex, Seveso Second Generation Health Study, 2014-2016

#### Figures:

*Supplementary Figure 1:* Example directed acyclic graph (DAG) of the association between maternal 1976 TCDD levels and neuropsychological functioning in children.

*Supplementary Figure 2:* Example directed acyclic graph (DAG) of the association between maternal TCDD levels estimated to pregnancy and neuropsychological functioning in children.

## Supplementary Tables

**Supplementary Table 1:** Distributions of maternal TCDD concentrations (ppt, lipid-adjusted) in serum collected near 1976 and estimated to the time of the pregnancy, Seveso Second Generation Health Study, 2014-2016

|                                       | <b>n</b> | <b>Geometric<br/>mean</b> | <b>95%CI</b>   | <b>min</b> | <b>25th</b> | <b>50th</b> | <b>75th</b> | <b>max</b> |
|---------------------------------------|----------|---------------------------|----------------|------------|-------------|-------------|-------------|------------|
| <i>All children</i>                   |          |                           |                |            |             |             |             |            |
| 1976 maternal concentration           | 161      | 99.0                      | (161.5, 127.7) | 5.5        | 40.4        | 74.6        | 214.0       | 9140.0     |
| Estimated concentrations in pregnancy | 161      | 4.6                       | (3.9, 5.5)     | 0.3        | 2.7         | 4.5         | 9.0         | 620.5      |
| <i>Male</i>                           |          |                           |                |            |             |             |             |            |
| 1976 maternal concentration           | 82       | 94.3                      | (64.1, 138.6)  | 5.5        | 40.6        | 73.9        | 211.0       | 9140.0     |
| Estimated concentrations in pregnancy | 82       | 3.8                       | (3.0, 4.8)     | 0.3        | 2.0         | 3.9         | 7.1         | 130.5      |
| <i>Female</i>                         |          |                           |                |            |             |             |             |            |
| 1976 maternal concentration           | 79       | 103.6                     | (73.4, 146.3)  | 9.9        | 35.0        | 75.2        | 244.0       | 2820.0     |
| Estimated concentrations in pregnancy | 79       | 5.7                       | (4.4, 7.4)     | 0.3        | 2.9         | 5.6         | 10.1        | 620.5      |

**Supplementary Table 2:** Distributions of neuropsychological test scores for all children and stratified by child sex, Seveso Second Generation Health Study, 2014-2016

| <b>Outcome</b>                                                | <b>All children (n=161)<br/>Mean (<math>\pm</math>sd)</b> | <b>Male (n=82)<br/>Mean (<math>\pm</math>sd)</b> | <b>Female (n=79)<br/>Mean (<math>\pm</math>sd)</b> |
|---------------------------------------------------------------|-----------------------------------------------------------|--------------------------------------------------|----------------------------------------------------|
| <b>Wisconsin Card Sorting Test (WCST)</b>                     |                                                           |                                                  |                                                    |
| Total errors T-score                                          | 49.6 (12.1)                                               | 48.1 (12.3)                                      | 51.2 (11.8)                                        |
| Trials to complete first set                                  | 18.7 (15.6)                                               | 19.6 (16.6)                                      | 17.7 (14.5)                                        |
| Perseverative errors T-score                                  | 52.1 (16.2)                                               | 50.5 (16.7)                                      | 53.7 (15.7)                                        |
| Non-perseverative errors T-score                              | 50.5 (11.8)                                               | 49.7 (12.3)                                      | 51.3 (11.3)                                        |
| <b>Connor's Continuous Performance Test (CPT)<sup>a</sup></b> |                                                           |                                                  |                                                    |
| Commission errors T-score                                     | 48.8 (11.4)                                               | 47.0 (11.8)                                      | 50.7 (10.8)                                        |
| Omission errors T-score                                       | 47.4 (7.6)                                                | 47.9 (8.)                                        | 46.9 (7.2)                                         |
| Hit rate SE overall T-score                                   | 47.2 (9.9)                                                | 48.4 (10.4)                                      | 45.9 (9.3)                                         |
| Hit rate SE between sets T-score                              | 48.6 (9.8)                                                | 49.3 (10.)                                       | 47.9 (9.6)                                         |
| ADHD confidence index                                         | 44.6 (17.2)                                               | 51.8 (16.1)                                      | 37.0 (15.1)                                        |
| <b>Rey's Auditory and Verbal Learning Test (RAVLT)</b>        |                                                           |                                                  |                                                    |
| Immediate recall                                              | 27.2 (5.5)                                                | 27.1 (5.3)                                       | 27.3 (5.7)                                         |
| Delayed recall                                                | 10.2 (2.5)                                                | 10.0 (2.6)                                       | 10.4 (2.3)                                         |
| <b>Ravens Progressive Matrices (RPM)</b>                      |                                                           |                                                  |                                                    |
| Total correct                                                 | 41.7 (9.3)                                                | 41.6 (9.4)                                       | 41.7 (9.2)                                         |

<sup>a</sup> Excluding one child with apparent non-effort or computer malfunction during assessment

## Supplementary Figures

**Supplementary Figure 1:** Example directed acyclic graph (DAG) of the association between maternal 1976 TCDD levels and neuropsychological functioning in children. The endogenous variables in this system are denoted by the treatment (▶, dioxin exposure), the outcome, I (i.e. performance on neuropsychological test), our a priori confounders, (pink and white), and adjustment set (white). Exogenous, unmeasured variables in the system that may potentially confound the relationship of interest are omitted:

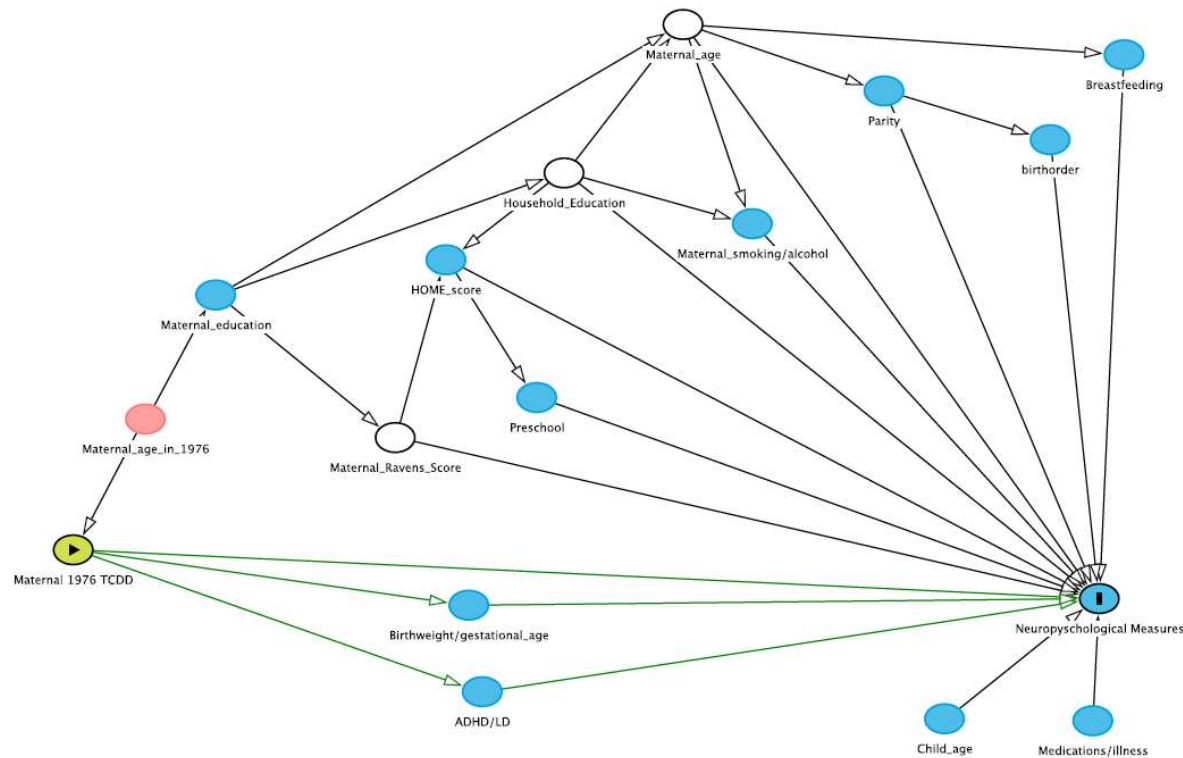

**Supplementary Figure 2:** Example directed acyclic graph (DAG) of the association between maternal TCDD levels estimated to pregnancy and neuropsychological functioning in children. The endogenous variables in this system are denoted by the treatment (▶, dioxin exposure), the outcome, I (i.e. performance on neuropsychological test), our a priori confounders, (pink and white), and adjustment set (white). Exogenous, unmeasured variables in the system that may potentially confound the relationship of interest are omitted:

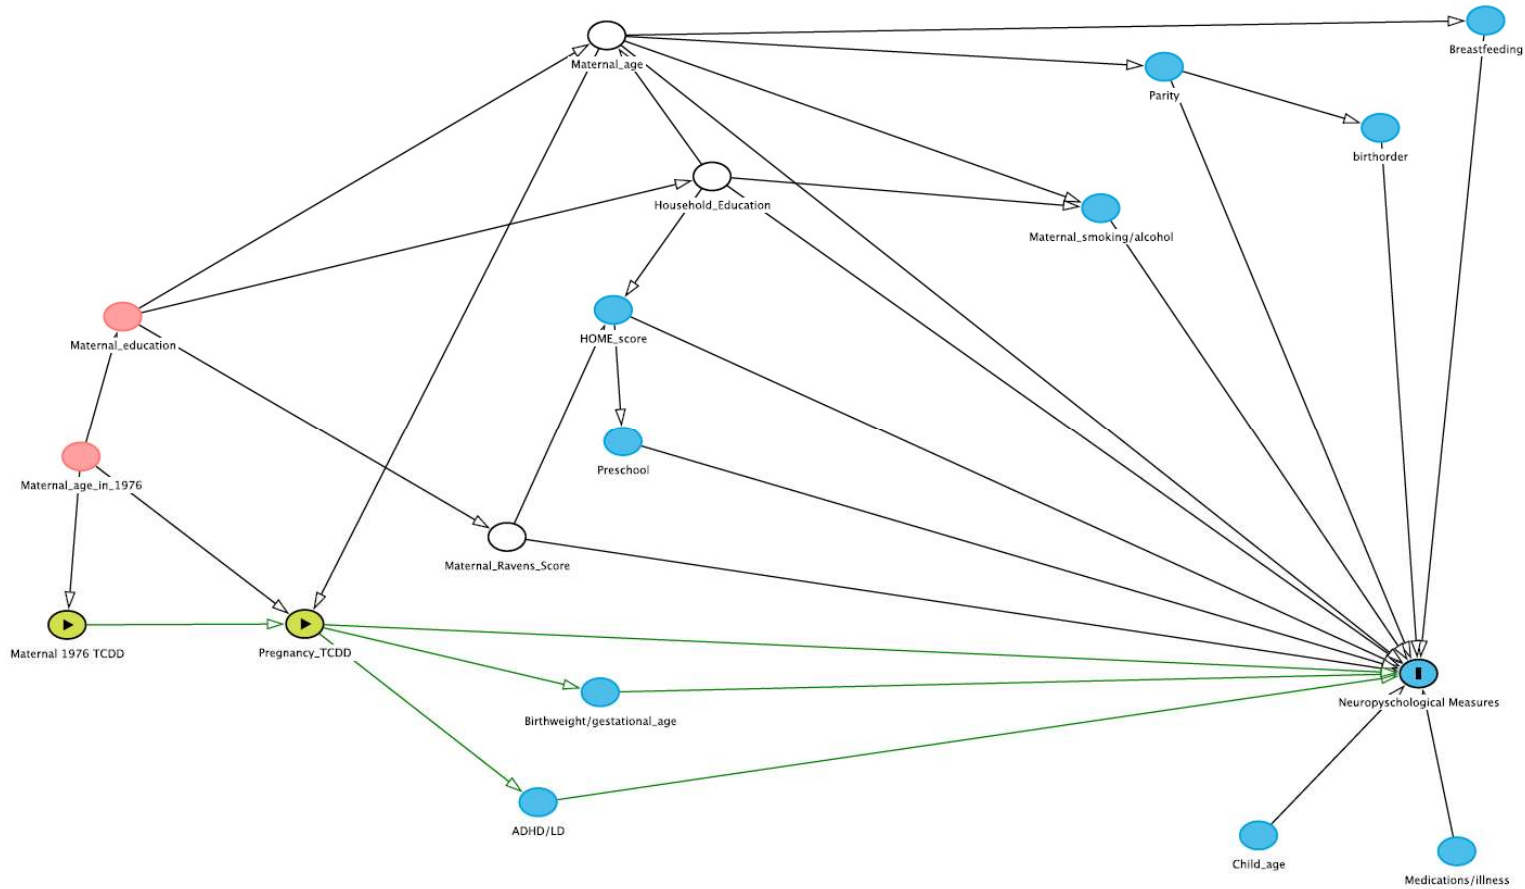

Supplement: NIHMS1518365-supplement-1.pdf [file NIHMS1518365-supplement-1.pdf]
